# Supplementary material
Source: PubMed Central journal article supplement (PMC3107038)
Supplement: NIHMS297792-supplement-01.pdf [file NIHMS297792-supplement-01.pdf]

**Neuron, Volume 70**

**Supplemental Information**

**TRIP8b Splice Forms Act in Concert to Regulate  
the Localization and Expression of HCN1  
Channels in CA1 Pyramidal Neurons**

**Rebecca Piskorowski, Bina Santoro, and Steven A. Siegelbaum**



**Figure S1. TRIP8b siRNA decreased TRIP8b expression *in vivo* as detected by immunohistochemistry.** (A) EGFP and TRIP8b expression in hippocampal slices from mice injected with lentiviral vectors expressing EGFP plus either control siRNA (top row) or TRIP8b siRNA (bottom row). Each row is from an independent experiment. Left column: EGFP fluorescence indicating infected region; middle column, immunostaining for TRIP8b; right column, merged image showing EGFP (green) and TRIP8b (red) signals. Note reduction in TRIP8b staining only in region of slices infected with virus expressing TRIP8b knockdown siRNA. (B) Quantification of TRIP8b staining intensity in regions of CA1 that were infected with control (left) or anti-TRIP8b (right) siRNAs. TRIP8b staining intensity was measured in *stratum pyramidale* (SP), *stratum radiatum* (SR) and *stratum lacunosum moleculare* (SLM). Regions that were EGFP positive were compared to regions that were EGFP negative in the same slice. Error bars show SEM. Asterisk denotes significant reduction in TRIP8b staining in region of slices infected with TRIP8b siRNA, relative to both uninfected (EGFP-negative) regions of same slice ( $p < 0.05$ ), and regions from a separate population of slices infected with control siRNA. (N=6 mice, 12 injections sites for TRIP8b siRNA; N=4 mice, 8 injections sites for control. Each data point is the average intensity of 17 infected regions).



**Figure S2. *Pex5l*<sup>tm1(KOMP)Vlcg</sup>, the TRIP8b 1b/2 knockout mouse.** (A) Diagram of the TRIP8b gene, showing strategy used by KOMP/Regeneron to replace exons 1b and 2 with the *lacZ* reporter expression cassette and produce the *Pex5l*<sup>tm1(KOMP)Vlcg</sup> allele. A second gene expression cassette contained the neomycin resistant gene driven by the human ubiquitin C gene promoter. The neomycin gene is flanked by loxP sites (red arrows). (B) A table listing the previously reported TRIP8b splice isoforms detected in mouse brain mRNA, the effect of each isoform on the surface expression of HCN1 when coexpressed in *Xenopus* oocytes and the isoform contribution to total brain TRIP8b mRNA (from Santoro et al., 2009). The isoforms shown in green were not expressed in the TRIP8b 1b/2 knockout mouse. (C) Western blot analysis of brain extracts from wild-type, heterozygous and homozygous TRIP8b 1b/2 KO mice showing the dose-dependent loss of TRIP8b(1b-2) and TRIP8b(1b-2-4). A mouse monoclonal antibody recognizing exon 1b (Neuromab) was used to detect TRIP8b(1b-2-4) and TRIP8b(1b-2). (D) Same brain extracts shown in (C) probed with an antibody against  $\alpha$  tubulin to control for total loaded protein. (E) Western blot probed with an antibody recognizing all TRIP8b isoforms to detect expression levels of indicated TRIP8b splice forms. Note that TRIP8b(1a-4) and TRIP8b(1a) were still expressed in the TRIP8b 1b/2 knockout brains whereas TRIP8b isoforms containing exons 1b or 2 were not detected. Bands were identified by matching their size to the size of individual TRIP8b isoforms heterologously expressed in *Xenopus* oocytes, as well as by using exon-specific antibodies to immunoprecipitate TRIP8b isoforms from mouse brain extracts, followed by Western blot analysis of the immunoprecipitate with either pan-TRIP8b or complementary exon-specific antibodies (data not shown). (F) Western blot probed with an antibody recognizing TRIP8b exon 4. Note that in extracts from the TRIP8b 1b/2 KO, TRIP8b(1a-4) was still present but TRIP8b(1a-2-4) and TRIP8b(1b-2-4) were absent.



**Figure S3. TRIP8b isoforms containing exons 1b or 2 are not expressed in pyramidal cells, but are present in oligodendrocytes.** (A) Immunofluorescence with antibody that detects all TRIP8b isoforms labelled very small cells in the hippocampal CA3 region (left and green signal on right). These small cells were also labeled with an antibody to CNPase (center and red signal on right), an oligodendrocyte marker. Scale bar 100  $\mu\text{m}$ . (B) TRIP8b antibody staining of small cells in CA3 was lost in the TRIP8b 1b/2 KO animals. Top row, Immunofluorescence for wild-type littermate controls. Left panel, Staining with pan-TRIP8b antibody. Center panel, Staining with antibody to  $\beta$ -galactosidase. Right, Antibody staining for TRIP8b (green) and  $\beta$ -galactosidase (red). Bottom row, Immunofluorescence for TRIP8b exon 1b/2 KO mice. Panels show staining with same antibodies as in top row. Scale bar 100  $\mu\text{m}$ . (C) Immunofluorescence with antibodies specific for either TRIP8b exon 4 (top row) or TRIP8b(1a) (bottom row) for hippocampal slices from wild-type and 1b/2 KO mice. Scale bar, 500  $\mu\text{m}$ .



**Figure S4. Quantification of HCN1 and TRIP8b CA1 dendritic gradients in wild-type and TRIP8b 1b/2 KO mice.** For all panels, the fluorescence intensity from coronal hippocampal slices immunostained with four different antibodies is plotted as a function of distance along the CA1 axis. The different dendritic layers, SO, SP, SR and SLM, are indicated at the top. Red traces correspond to TRIP8b 1b/2 KO mice and black to wildtype littermate controls. (A) Immunolabeling performed with an HCN1 monoclonal ab (N70/28). (B) Immunolabeling performed with a different HCN1 monoclonal ab (recognizes a different epitope from (A), rat 7C3). (C) Immunolabeling with a monoclonal ab that recognizes all TRIP8b splice isoforms (N212/17). (D) Immunolabeling with a polyclonal antibody that recognizes all TRIP8b splice isoforms (794). For all panels, N= 2 animals for both TRIP8b 1b/2 KO and control. 3 slices were analyzed from each animal. Plots show mean  $\pm$  SEM.



**Figure S5. Specificity of TRIP8b(1a-4) and TRIP8b(1a) antibodies.** (A) Western blot analysis of *Xenopus* oocyte extracts that had been injected with cRNA encoding TRIP8b(1b-2-4) or TRIP8b(1b-2). Left, blots probed with TRIP8b antibody that recognizes all isoforms. Right, same extracts probed with a mouse monoclonal antibody that recognizes TRIP8b exon 4. Note that TRIP8b(1b-2-4) is recognized whereas TRIP8b(1b-2) is not. (B) Immunofluorescence of hippocampal slices from mice injected in CA1 with lentivirus expressing TRIP8b(1a-4)-HA (top row) or TRIP8b(1a)-HA (bottom row). Left column, slices stained with exon 4 antibody. Middle column, slices stained with HA antibody. Right column, superposition of exon 4 (green) and HA (red) staining. Note: co-labeling between exon 4 and HA antibodies was observed in neurons infected with TRIP8b(1a-4)-HA but not TRIP8b(1a)-HA. Scale bar 20  $\mu$ m. (C) Western blots from extracts of *Xenopus* oocytes expressing TRIP8b(1b-2), TRIP8b(1a) and TRIP8b(1a-4). Left, blots probed with TRIP8b antibody that recognizes all isoforms. Right, same extracts probed with TRIP8b(1a) antibody. (D) Immunofluorescence from similar experiment as shown in (B) showing neurons virally expressing TRIP8b(1a)-HA (top row) were co-labeled with TRIP8b(1a) (left column) and HA (center column) antibodies. Neurons virally expressing TRIP8b(1a-4)-HA were not co-labeled (bottom row). Scale bar, 20  $\mu$ m.

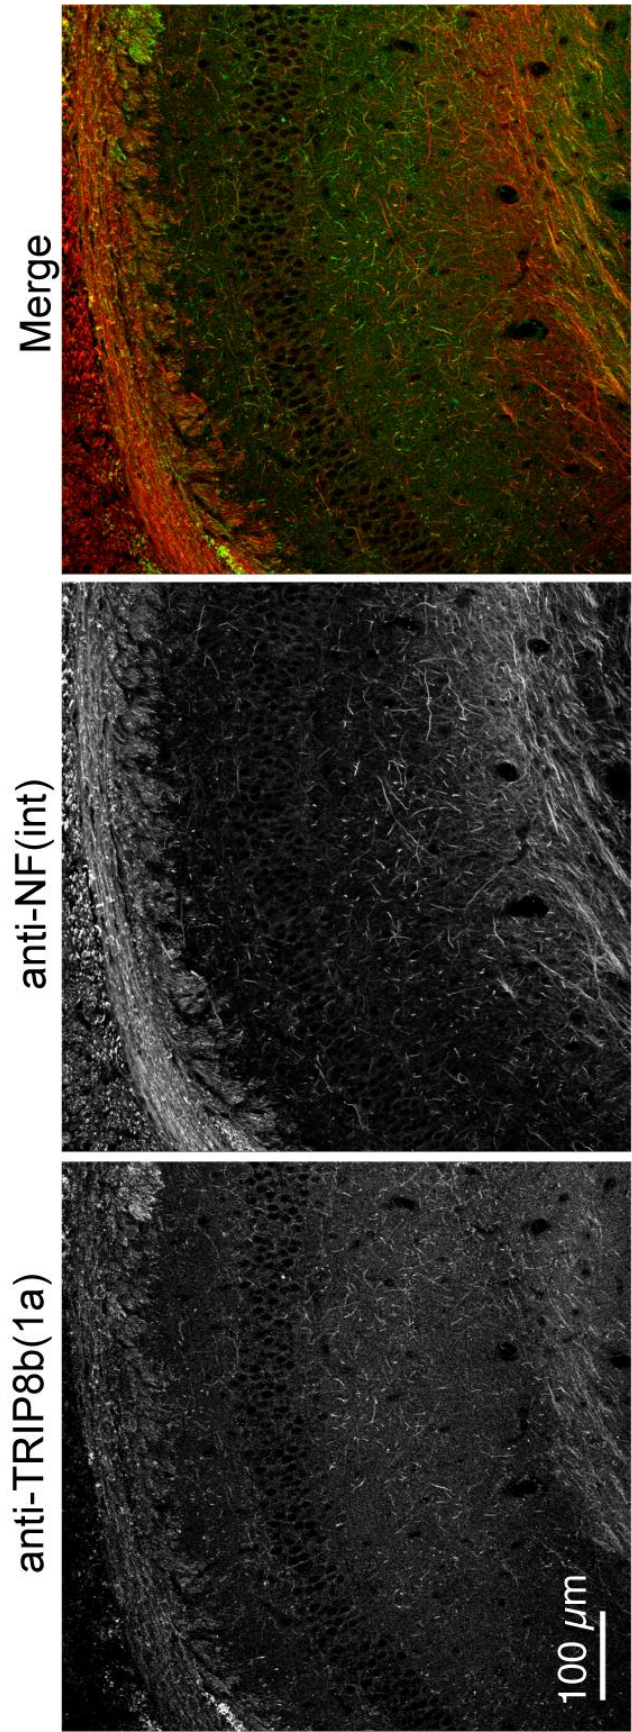

Figure S6

**Figure S6. Fibers labeled by TRIP8b(1a) antibody are also labeled with antibody to intermediate sized neurofilament.** (A) Left, Staining of the CA1 region of a hippocampal slice by a chicken polyclonal antibody to TRIP8b(1a). Center, Staining of CA1 region of same slice with antibody to intermediate-sized neurofilament, NF(int), an axonal marker. All fibers labeled with the TRIP8b(1a) antibody are colabeled with the antibody to NF(int), indicating axonal localization of TRIP8b(1a).

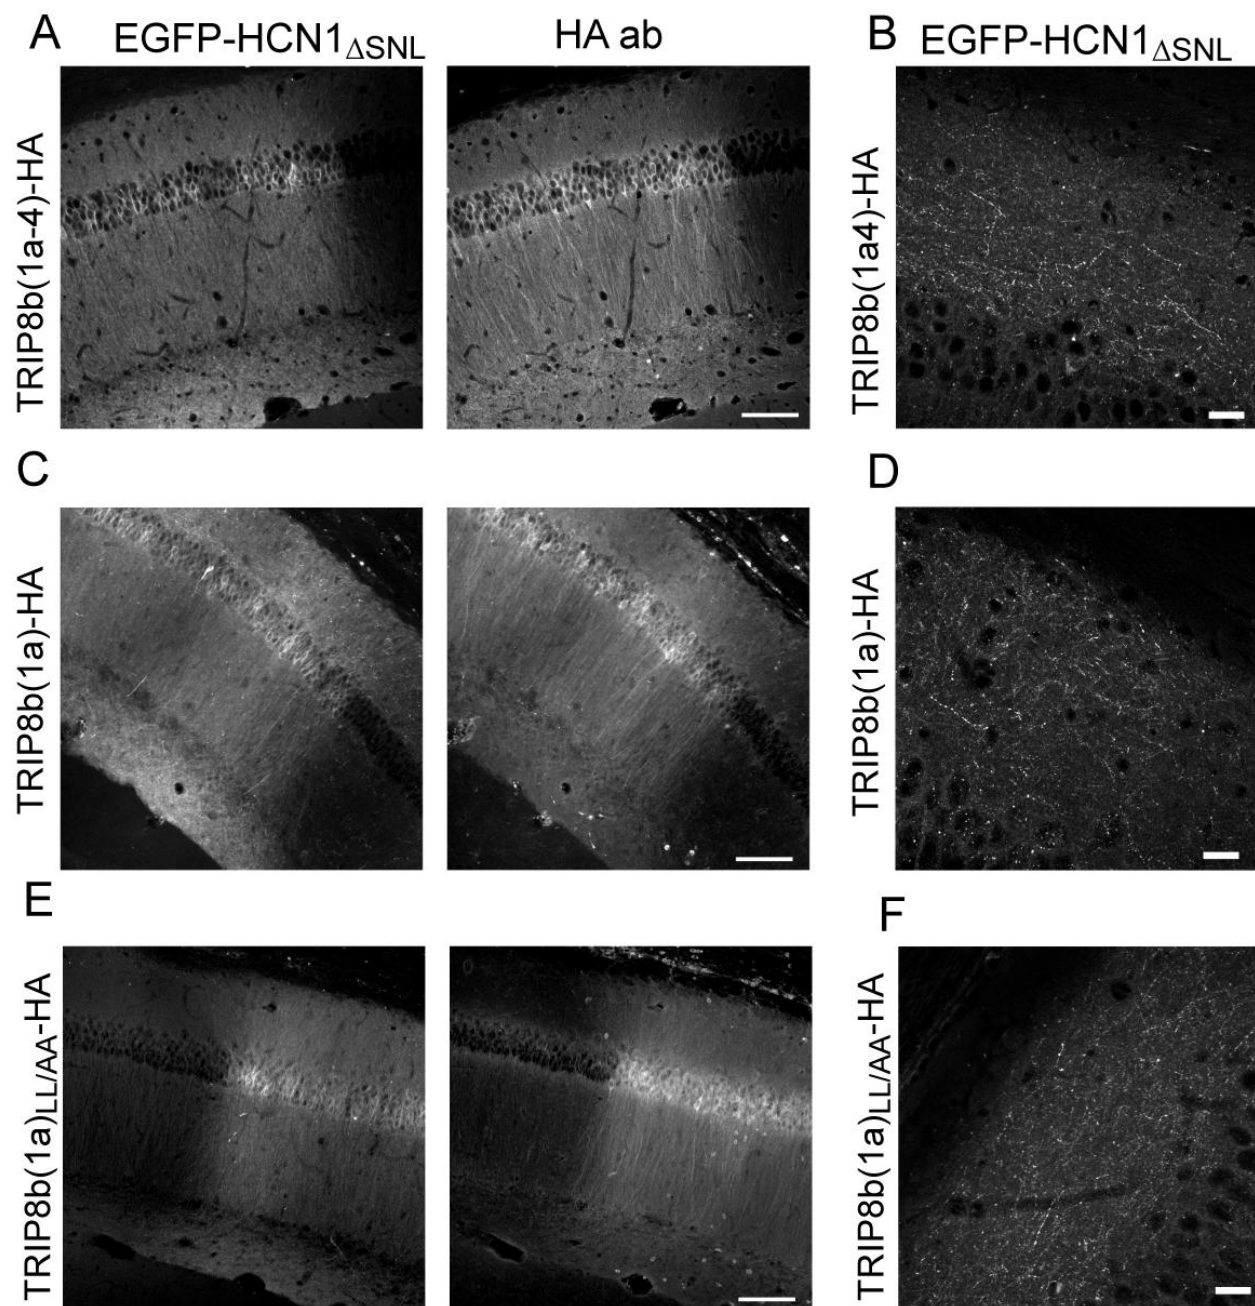

Figure S7, Related to figure 8

**Figure S7. Co-expression of HA-tagged TRIP8b splice forms has no effect on the expression pattern of EGFP-HCN1<sub>ΔSNL</sub>.** Confocal z-series of pyramidal neurons in the CA1 region of the hippocampus that have been co-infected with EGFP-HCN1<sub>ΔSNL</sub> and HA-tagged TRIP8b isoforms. (A, C, E) Left panels, EGFP-HCN1<sub>ΔSNL</sub> fluorescence images in response to viral expression of TRIP8b(1a-4) (A), TRIP8b(1a) (B), or TRIP8b(1a)<sub>LL/AA</sub> (C). Right panels, HA antibody signal detecting virally expressed HA-tagged TRIP8b isoforms. Scale bar 100 μm. (B, D, F) Higher-magnification z-series projection images of EGFP signal from hippocampus contralateral to that coinjected with virus expressing EGFP-HCN1<sub>ΔSNL</sub> with TRIP8b(1a-4) (B), TRIP8b(1a) (D) or TRIP8b(1a)<sub>LL/AA</sub> (F). Scale bar 20 μm. Note that over-expression of TRIP8b splice forms has no effect on EGFP-HCN1<sub>ΔSNL</sub> distribution (compare to Figure 4 showing EGFP-HCN1<sub>ΔSNL</sub> signal without TRIP8b coexpression).









**Supplemental Material References:**

Muller, F., Scholten, A., Ivanova, E., Haverkamp, S., Kremmer, E., and Kaupp, U.B. (2003). HCN channels are expressed differentially in retinal bipolar cells and concentrated at synaptic terminals. *Eur J Neurosci* 17, 2084-2096.
